# Supplementary material for: Y-shaped metal-free D–π–(A)2 sensitizers for high-performance dye-sensitized solar cells
Source: Royal Society of Chemistry journal article supplement (doi:10.1039/c3ta14404f), 2013-11-27

## Supplementary information

### Y-shaped Meal-Free D- $\pi$ -(A)<sub>2</sub> Sensitizers for High-Performance Dye-Sensitized Solar Cells

Ryan Yeh-Yung Lin,<sup>a,b</sup> Feng-Ling Wu,<sup>a</sup> Chia-Hao Chang,<sup>a</sup> Hsien-Hsin Chou,<sup>a</sup> Tzu-Man Chuang,<sup>a,c</sup> Te-Chun Chu,<sup>b</sup> Chih-Yu Hsu,<sup>a</sup> Ping-Wei Chen,<sup>b</sup> Kuo-Chuan Ho,<sup>b,d</sup> Yih-Hsing Lo<sup>c</sup> and Jiann T. Lin<sup>\*a</sup>

<sup>a</sup> Institute of Chemistry, Academia Sinica, Nankang 11529, Taipei, Taiwan

<sup>b</sup> Department of Chemical Engineering, National Taiwan University, Taipei 10617, Taiwan

<sup>c</sup> Department of Applied Physics and Chemistry, University of Taipei, Taipei 100, Taiwan

<sup>d</sup> Institute of Polymer Science and Engineering, National Taiwan University, Taipei 10617, Taiwan

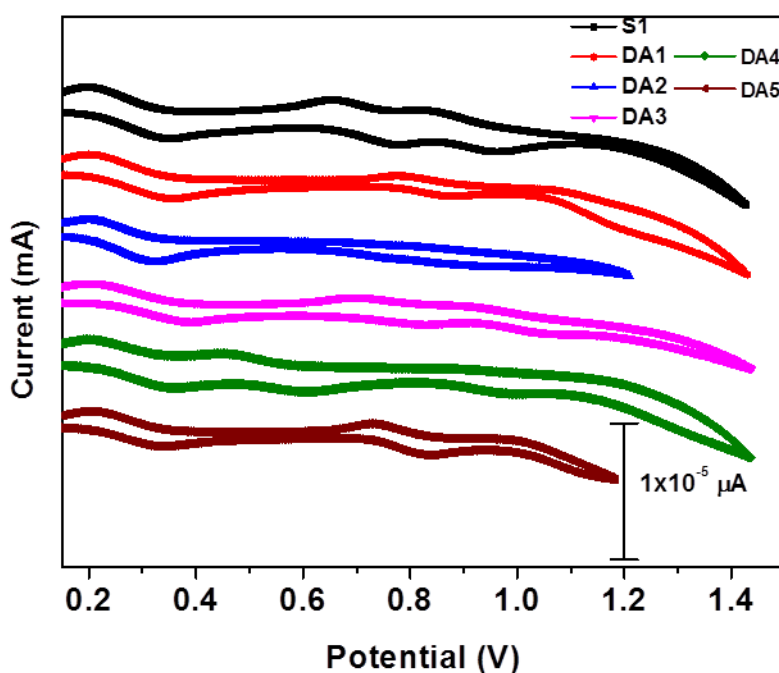

Fig. S1 Cyclic voltammograms of DA dyes recorded in THF.

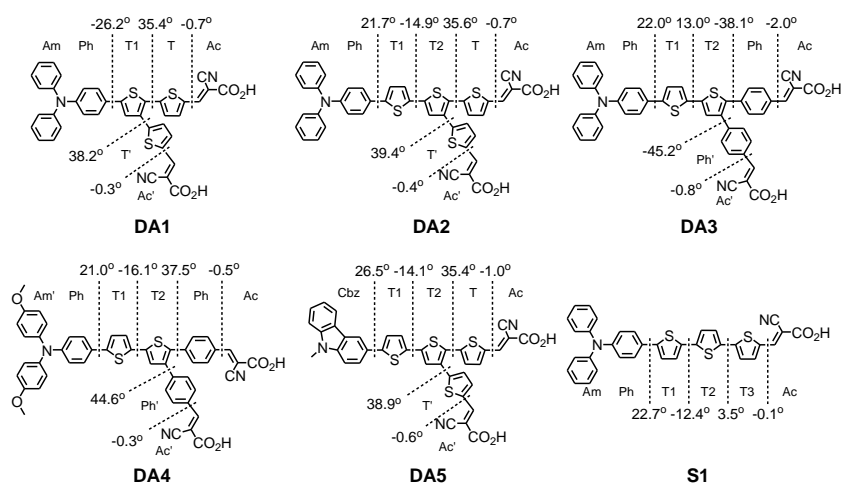

Fig. S2 Schematic division and dihedral angles of molecules.

DA1

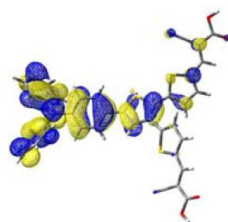

HOMO

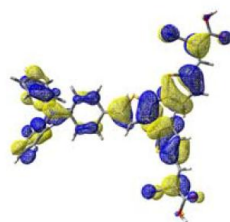

HOMO-1

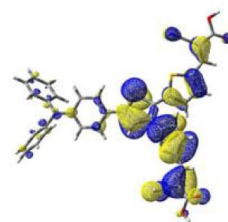

HOMO-2

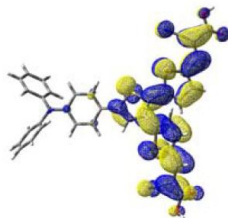

LUMO

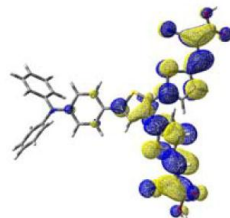

LUMO+1

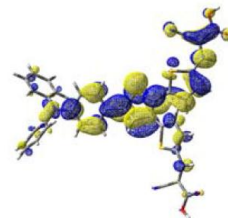

LUMO+2

DA2

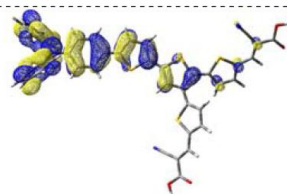

HOMO

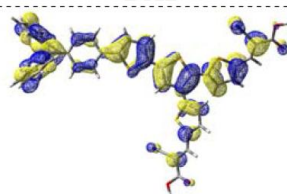

HOMO-1

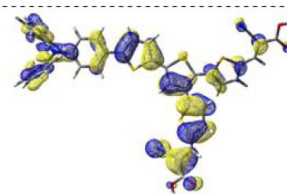

HOMO-2

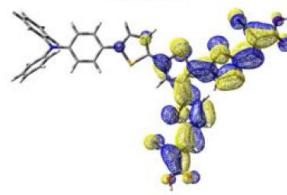

LUMO

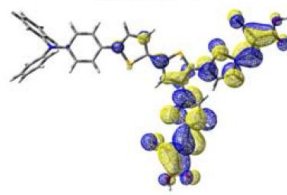

LUMO+1

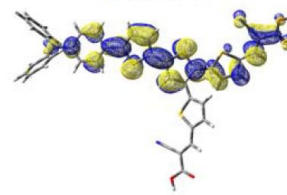

LUMO+2

DA3

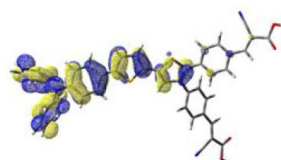

HOMO

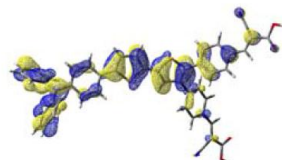

HOMO-1

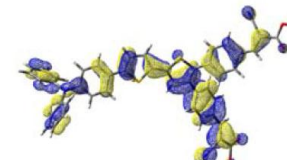

HOMO-2

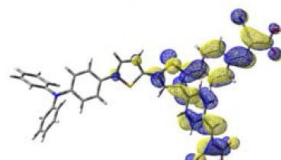

LUMO

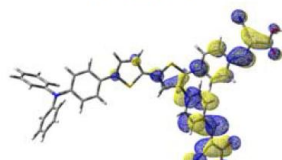

LUMO+1

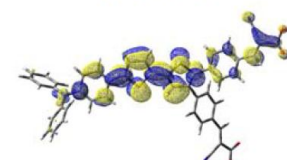

LUMO+2

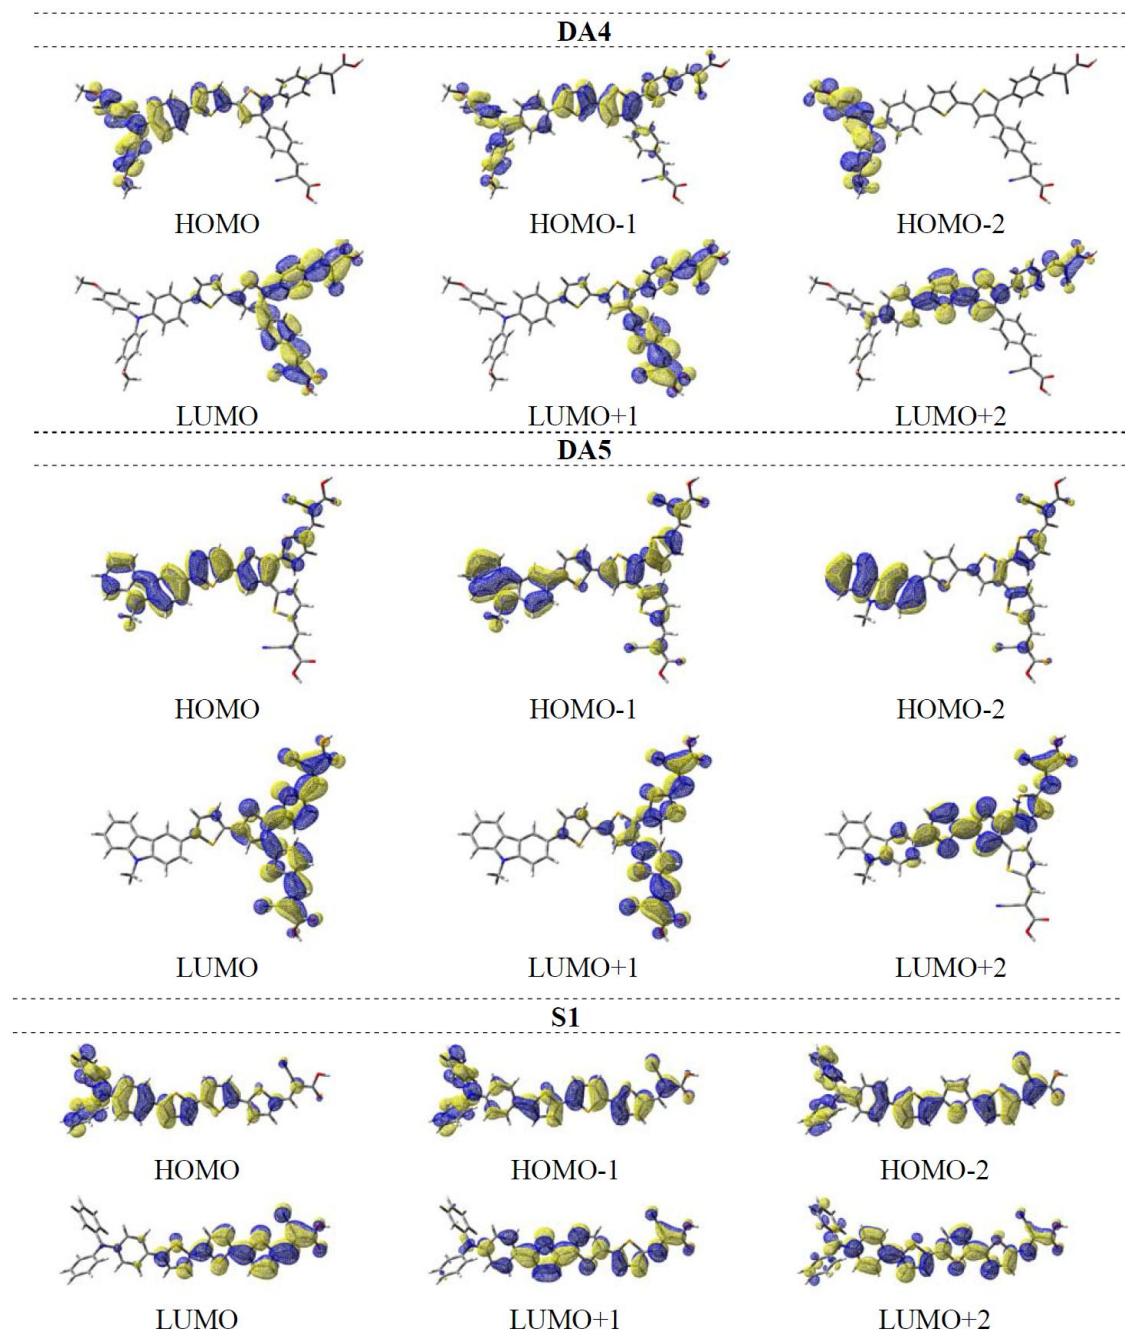

**Fig. S3** Selected frontier orbitals of the dyes.

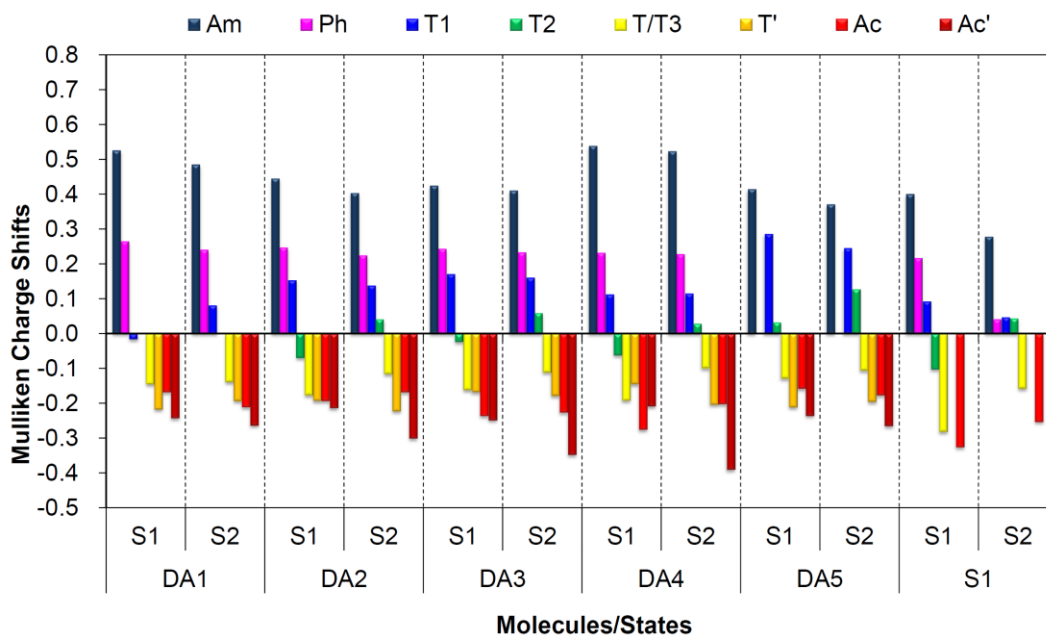

**Fig. S4** Plot of the difference in the Mulliken charges between the ground and the excited states.

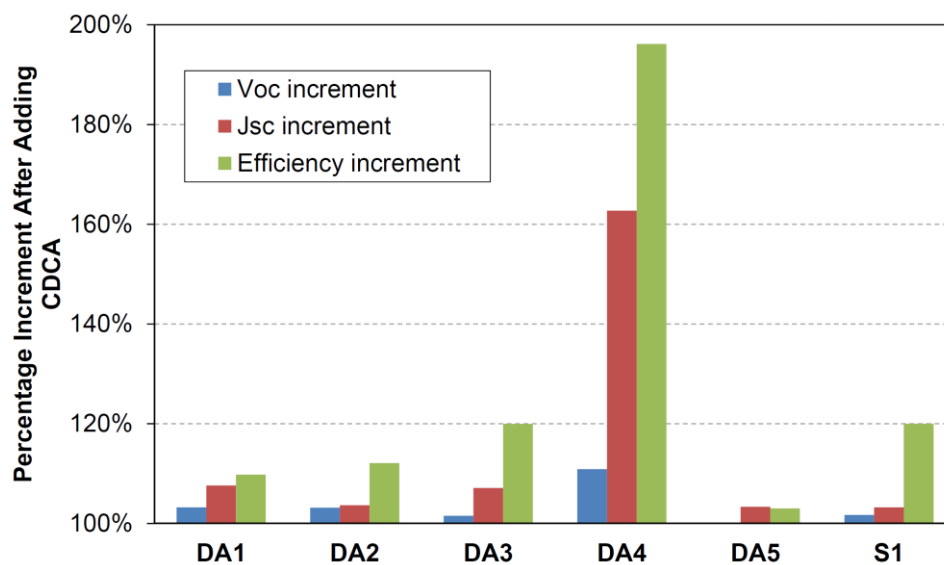

**Fig. S5** Plot of the percentage increments of the device performance parameters after addition of CDCA.

**Table S1.** Calculated lower-lying transitions of the dyes.<sup>a</sup>

| Dye        | State          | Excitation <sup>a</sup> | $\lambda_{\text{cal}}$ ,<br>eV | $f^b$          | $\Delta$ (Mulliken<br>charge), <sup>c</sup>  e | $f \times \Delta q$ | Dye             | State          | Excitation <sup>a</sup> | $\lambda_{\text{cal}}$ ,<br>eV | $f^b$           | $\Delta$ (Mulliken<br>charge), <sup>c</sup>  e | $f \times \Delta q$ |          |       |           |       |
|------------|----------------|-------------------------|--------------------------------|----------------|------------------------------------------------|---------------------|-----------------|----------------|-------------------------|--------------------------------|-----------------|------------------------------------------------|---------------------|----------|-------|-----------|-------|
| <b>DA1</b> | S <sub>1</sub> | H → L (99%)             | 1.86                           | 0.22           | Am: 0.53                                       | -0.04               | <b>DA2</b>      | S <sub>1</sub> | H → L<br>(99%)          | 1.73                           | 0.25            | Am: 0.45                                       | -0.05               |          |       |           |       |
|            |                |                         |                                |                | Ph: 0.27                                       | -0.05               |                 |                |                         |                                |                 | Ph: 0.25                                       | -0.05               |          |       |           |       |
|            |                |                         |                                |                | T1: -0.02                                      |                     |                 |                |                         |                                |                 | T1: 0.15                                       |                     |          |       |           |       |
|            | T: -0.15       |                         | T2: -0.07                      |                |                                                |                     |                 |                |                         |                                |                 |                                                |                     |          |       |           |       |
|            | T': -0.22      |                         | T: -0.18                       |                |                                                |                     |                 |                |                         |                                |                 |                                                |                     |          |       |           |       |
|            | Ac: -0.17      |                         | T': -0.19                      |                |                                                |                     |                 |                |                         |                                |                 |                                                |                     |          |       |           |       |
|            | Ac': -0.24     |                         | Ac: -0.19                      |                |                                                |                     |                 |                |                         |                                |                 |                                                |                     |          |       |           |       |
|            |                |                         | Ac': -0.21                     |                |                                                |                     |                 |                |                         |                                |                 |                                                |                     |          |       |           |       |
|            |                |                         |                                |                | S <sub>2</sub>                                 | H → L1<br>(97%)     |                 | 2.29           | 0.24                    | Am: 0.49                       | -0.05           | S <sub>2</sub>                                 | H → L1<br>(96%)     | 2.15     | 0.25  | Am: 0.40  | -0.04 |
|            |                | Ph: 0.24                | -0.06                          | Ph: 0.23       | -0.08                                          |                     |                 |                |                         |                                |                 |                                                |                     |          |       |           |       |
|            |                | T1: 0.08                |                                | T1: 0.14       |                                                |                     |                 |                |                         |                                |                 |                                                |                     |          |       |           |       |
|            |                | T: -0.14                |                                | T2: 0.04       |                                                |                     |                 |                |                         |                                |                 |                                                |                     |          |       |           |       |
|            |                | T': -0.19               |                                | T: -0.12       |                                                |                     |                 |                |                         |                                |                 |                                                |                     |          |       |           |       |
|            |                | Ac: -0.21               |                                | T': -0.22      |                                                |                     |                 |                |                         |                                |                 |                                                |                     |          |       |           |       |
|            |                | Ac': -0.26              |                                | Ac: -0.17      |                                                |                     |                 |                |                         |                                |                 |                                                |                     |          |       |           |       |
|            |                |                         |                                | Ac': -0.30     |                                                |                     |                 |                |                         |                                |                 |                                                |                     |          |       |           |       |
|            |                |                         |                                |                |                                                | S <sub>3</sub>      | H1 → L<br>(98%) | 2.60           | 0.66                    | Am: 0.17                       | -0.06           | S <sub>3</sub>                                 | H1 → L<br>(97%)     | 2.37     | 0.53  | Am: 0.24  | -0.07 |
|            |                | Ph: 0.04                | -0.10                          | Ph: 0.05       | -0.11                                          |                     |                 |                |                         |                                |                 |                                                |                     |          |       |           |       |
|            |                | T1: 0.10                |                                | T1: 0.14       |                                                |                     |                 |                |                         |                                |                 |                                                |                     |          |       |           |       |
|            |                | T: 0.01                 |                                | T2: 0.11       |                                                |                     |                 |                |                         |                                |                 |                                                |                     |          |       |           |       |
|            |                | T': -0.07               |                                | T: -0.06       |                                                |                     |                 |                |                         |                                |                 |                                                |                     |          |       |           |       |
|            |                | Ac: -0.09               |                                | T': -0.16      |                                                |                     |                 |                |                         |                                |                 |                                                |                     |          |       |           |       |
|            |                | Ac': -0.16              |                                | Ac: -0.13      |                                                |                     |                 |                |                         |                                |                 |                                                |                     |          |       |           |       |
|            |                |                         |                                | Ac': -0.20     |                                                |                     |                 |                |                         |                                |                 |                                                |                     |          |       |           |       |
| <b>DA3</b> | S <sub>1</sub> | H → L (99%)             | 1.90                           | 0.24           | Am: 0.42                                       | -0.06               | <b>DA4</b>      | S <sub>1</sub> | H → L<br>(99%)          | 1.73                           | 0.23            | Am': 0.54                                      | -0.06               |          |       |           |       |
|            |                |                         |                                |                | Ph: 0.24                                       | -0.06               |                 |                |                         |                                |                 | Ph: 0.23                                       | -0.05               |          |       |           |       |
|            |                |                         |                                |                | T1: 0.17                                       |                     |                 |                |                         |                                |                 | T1: 0.11                                       |                     |          |       |           |       |
|            | T2: -0.02      |                         | T2: -0.06                      |                |                                                |                     |                 |                |                         |                                |                 |                                                |                     |          |       |           |       |
|            | Ph: -0.16      |                         | Ph: -0.19                      |                |                                                |                     |                 |                |                         |                                |                 |                                                |                     |          |       |           |       |
|            | Ph': -0.17     |                         | Ph': -0.14                     |                |                                                |                     |                 |                |                         |                                |                 |                                                |                     |          |       |           |       |
|            | Ac: -0.24      |                         | Ac: -0.28                      |                |                                                |                     |                 |                |                         |                                |                 |                                                |                     |          |       |           |       |
|            | Ac': -0.25     |                         | Ac': -0.21                     |                |                                                |                     |                 |                |                         |                                |                 |                                                |                     |          |       |           |       |
|            |                |                         |                                |                | S <sub>2</sub>                                 | H → L1<br>(98%)     |                 | 2.19           | 0.28                    | Am: 0.41                       | -0.06           | S <sub>2</sub>                                 | H → L1<br>(99%)     | 2.03     | 0.19  | Am': 0.52 | -0.04 |
|            |                | Ph: 0.23                | -0.10                          | Ph: 0.23       | -0.07                                          |                     |                 |                |                         |                                |                 |                                                |                     |          |       |           |       |
|            |                | T1: 0.16                |                                | T1: 0.12       |                                                |                     |                 |                |                         |                                |                 |                                                |                     |          |       |           |       |
|            |                | T2: 0.06                |                                | T2: 0.03       |                                                |                     |                 |                |                         |                                |                 |                                                |                     |          |       |           |       |
|            |                | Ph: -0.11               |                                | Ph: -0.10      |                                                |                     |                 |                |                         |                                |                 |                                                |                     |          |       |           |       |
|            |                | Ph': -0.18              |                                | Ph': -0.20     |                                                |                     |                 |                |                         |                                |                 |                                                |                     |          |       |           |       |
|            |                | Ac: -0.23               |                                | Ac: -0.20      |                                                |                     |                 |                |                         |                                |                 |                                                |                     |          |       |           |       |
|            |                | Ac': -0.35              |                                | Ac': -0.39     |                                                |                     |                 |                |                         |                                |                 |                                                |                     |          |       |           |       |
|            |                |                         |                                |                |                                                | S <sub>3</sub>      | H1 → L<br>(97%) | 2.56           | 0.34                    | Am: 0.29                       | -0.07           | S <sub>3</sub>                                 | H1 → L<br>(97%)     | 2.46     | 0.40  | Am': 0.25 | -0.09 |
|            |                | Ph: 0.06                | -0.09                          | Ph: 0.06       | -0.09                                          |                     |                 |                |                         |                                |                 |                                                |                     |          |       |           |       |
|            |                | T1: 0.17                |                                | T1: 0.23       |                                                |                     |                 |                |                         |                                |                 |                                                |                     |          |       |           |       |
|            |                | T2: 0.18                |                                | T2: 0.17       |                                                |                     |                 |                |                         |                                |                 |                                                |                     |          |       |           |       |
|            |                | Ph: -0.08               |                                | Ph: -0.11      |                                                |                     |                 |                |                         |                                |                 |                                                |                     |          |       |           |       |
|            |                | Ph': -0.16              |                                | Ph': -0.14     |                                                |                     |                 |                |                         |                                |                 |                                                |                     |          |       |           |       |
|            |                | Ac: -0.19               |                                | Ac: -0.23      |                                                |                     |                 |                |                         |                                |                 |                                                |                     |          |       |           |       |
|            |                | Ac': -0.26              |                                | Ac': -0.23     |                                                |                     |                 |                |                         |                                |                 |                                                |                     |          |       |           |       |
| <b>DA5</b> | S <sub>1</sub> | H → L (99%)             | 1.91                           | 0.34           | Cbz: 0.42                                      | -0.05               | <b>S1</b>       | S <sub>1</sub> | H → L<br>(99%)          | 2.03                           | 0.88            | Am: 0.40                                       | -0.29               |          |       |           |       |
|            |                |                         |                                |                | T1: 0.29                                       | -0.08               |                 |                |                         |                                |                 | Ph: 0.22                                       |                     |          |       |           |       |
|            |                |                         |                                |                | T2: 0.03                                       |                     |                 |                |                         |                                |                 | T1: 0.09                                       |                     |          |       |           |       |
|            | T: -0.13       |                         | T2: -0.10                      |                |                                                |                     |                 |                |                         |                                |                 |                                                |                     |          |       |           |       |
|            | T': -0.21      |                         | T3: -0.28                      |                |                                                |                     |                 |                |                         |                                |                 |                                                |                     |          |       |           |       |
| Ac: -0.16  |                | Ac: -0.33               |                                |                |                                                |                     |                 |                |                         |                                |                 |                                                |                     |          |       |           |       |
| Ac': -0.24 |                |                         |                                | S <sub>2</sub> | H → L1<br>(95%)                                | 2.33                | 0.35            | Cbz: 0.37      | -0.06                   | S <sub>2</sub>                 | H1 → L<br>(93%) | 2.63                                           | 0.93                | Am: 0.28 | -0.24 |           |       |
|            |                | T1: 0.25                | -0.09                          | T1: 0.25       | -0.09                                          |                     |                 |                |                         |                                |                 |                                                |                     |          |       |           |       |
|            |                | T2: 0.13                |                                | T2: 0.13       |                                                |                     |                 |                |                         |                                |                 |                                                |                     |          |       |           |       |
|            |                |                         |                                |                |                                                | H → L1              |                 |                |                         |                                |                 | Ph: 0.04                                       |                     |          |       |           |       |
|            |                |                         |                                |                |                                                |                     |                 |                |                         |                                |                 | T1: 0.05                                       |                     |          |       |           |       |

|                |                 |      |      |            |       |                |                 |           |      |           |       |
|----------------|-----------------|------|------|------------|-------|----------------|-----------------|-----------|------|-----------|-------|
|                |                 |      |      | T: -0.11   |       | (6%)           |                 | T2: 0.04  |      |           |       |
|                |                 |      |      | T': -0.20  |       |                |                 | T3: -0.16 |      |           |       |
|                |                 |      |      | Ac: -0.18  |       |                |                 | Ac: -0.25 |      |           |       |
|                |                 |      |      | Ac': -0.27 |       |                |                 |           |      |           |       |
| S <sub>3</sub> | H1 → L<br>(97%) | 2.53 | 0.40 | Cbz: 0.50  | -0.06 | S <sub>3</sub> | H2 → L<br>(8%)  | 2.98      | 0.28 | Am: 0.34  | -0.05 |
|                |                 |      |      | T1: 0.03   | -0.07 |                | H1 → L<br>(5%)  |           |      | Ph: 0.07  |       |
|                |                 |      |      | T2: 0.01   |       |                | H → L1<br>(85%) |           |      | T1: -0.08 |       |
|                |                 |      |      | T: -0.09   |       |                |                 |           |      | T2: -0.08 |       |
|                |                 |      |      | T': -0.12  |       |                |                 |           |      | T3: -0.09 |       |
|                |                 |      |      | Ac: -0.15  |       |                |                 |           |      | Ac: -0.17 |       |
|                |                 |      |      | Ac': -0.17 |       |                |                 |           |      |           |       |

<sup>a</sup> Results are based on gas-phase TD-DFT calculation. <sup>b</sup> H = HOMO, L = LUMO, H1 = The next highest occupied molecular orbital, or HOMO - 1, H2 = HOMO - 2, L1 = LUMO + 1, L2 = LUMO + 2. In parentheses is the population of a pair of MO excitations. <sup>c</sup> Oscillator strength. <sup>d</sup> The difference of the Mulliken charge between the ground state and excited state.

NAME CH14 Mas 20121114  
 EXNO 1  
 PROCNO 1  
 Date\_ 20121114  
 TIME 11:32  
 INSTRUM spect  
 PROBRD 5 mm QNP 1H/13  
 PULPROG zgpg30  
 D1 15.00  
 SOLVENT CDCl3  
 NS 8  
 LS 0  
 SWH 4807.652 Hz  
 F2 101.626 MHz  
 F1 500.136098 MHz  
 AQ 1.703980 sec  
 RG 181  
 DW 104.000 usec  
 DE 19.00 usec  
 TE 25.7  
 D1 2.00000000 sec  
 D11 1  
 ===== CHANNEL f1 =====  
 NUCL1 1H  
 P1 9.10 usec  
 PL 0.00 dB  
 FWH 25.37 usec  
 SFO1 500.136098 MHz  
 SI 8192  
 SF 300.1300124 MHz  
 WDW no  
 LB 0  
 GB 0  
 PC 1.00

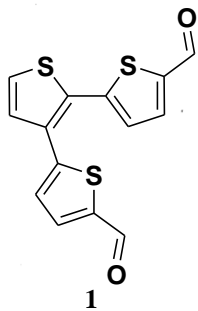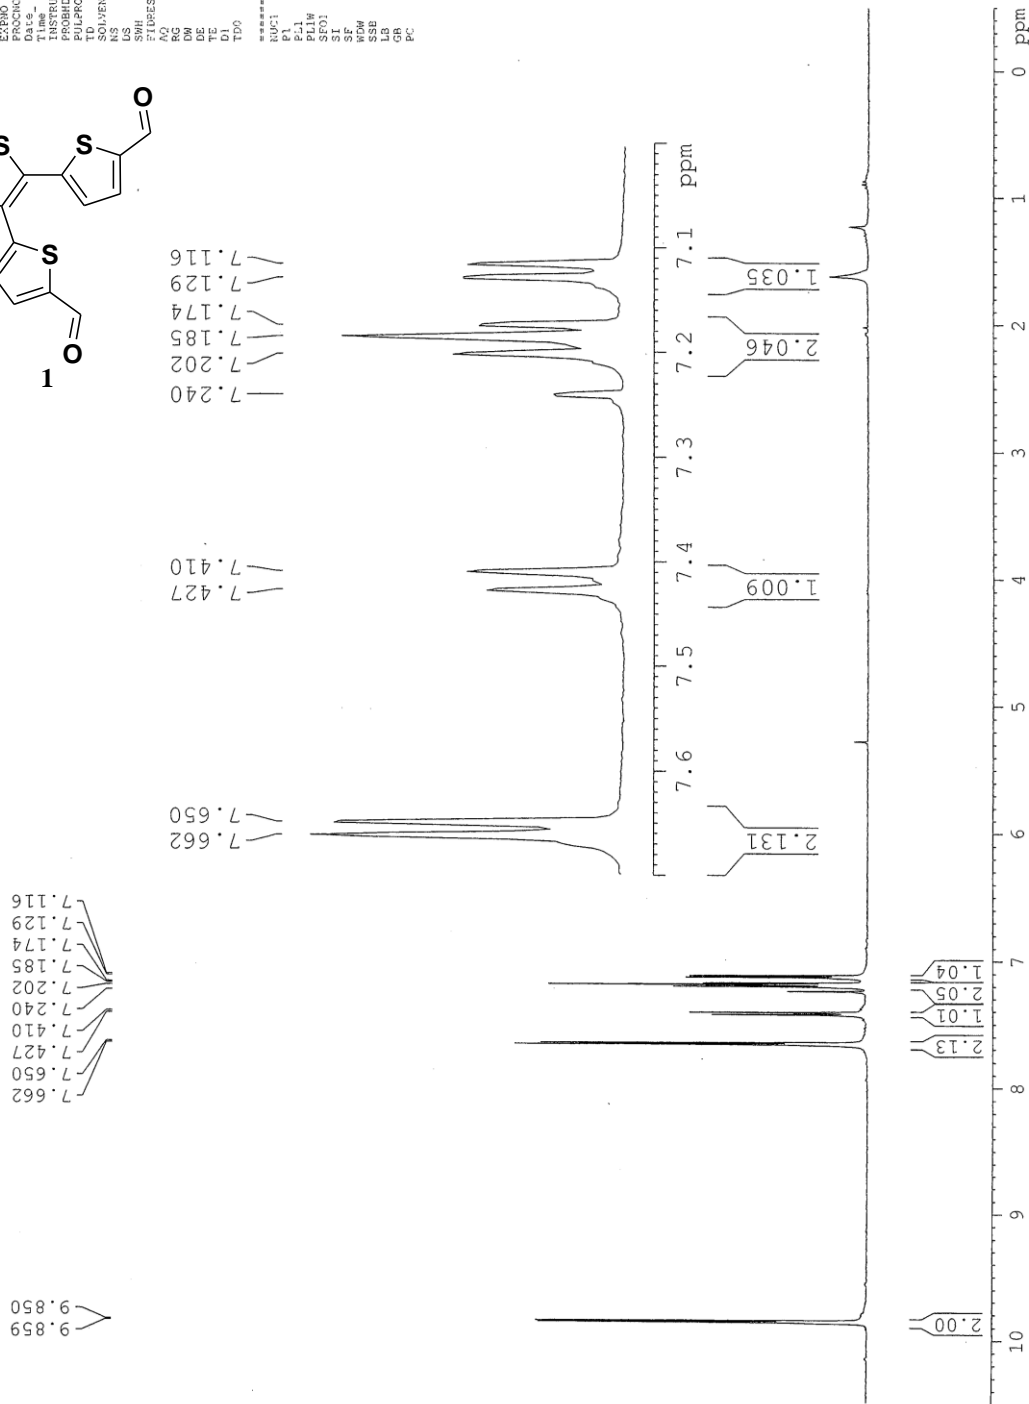

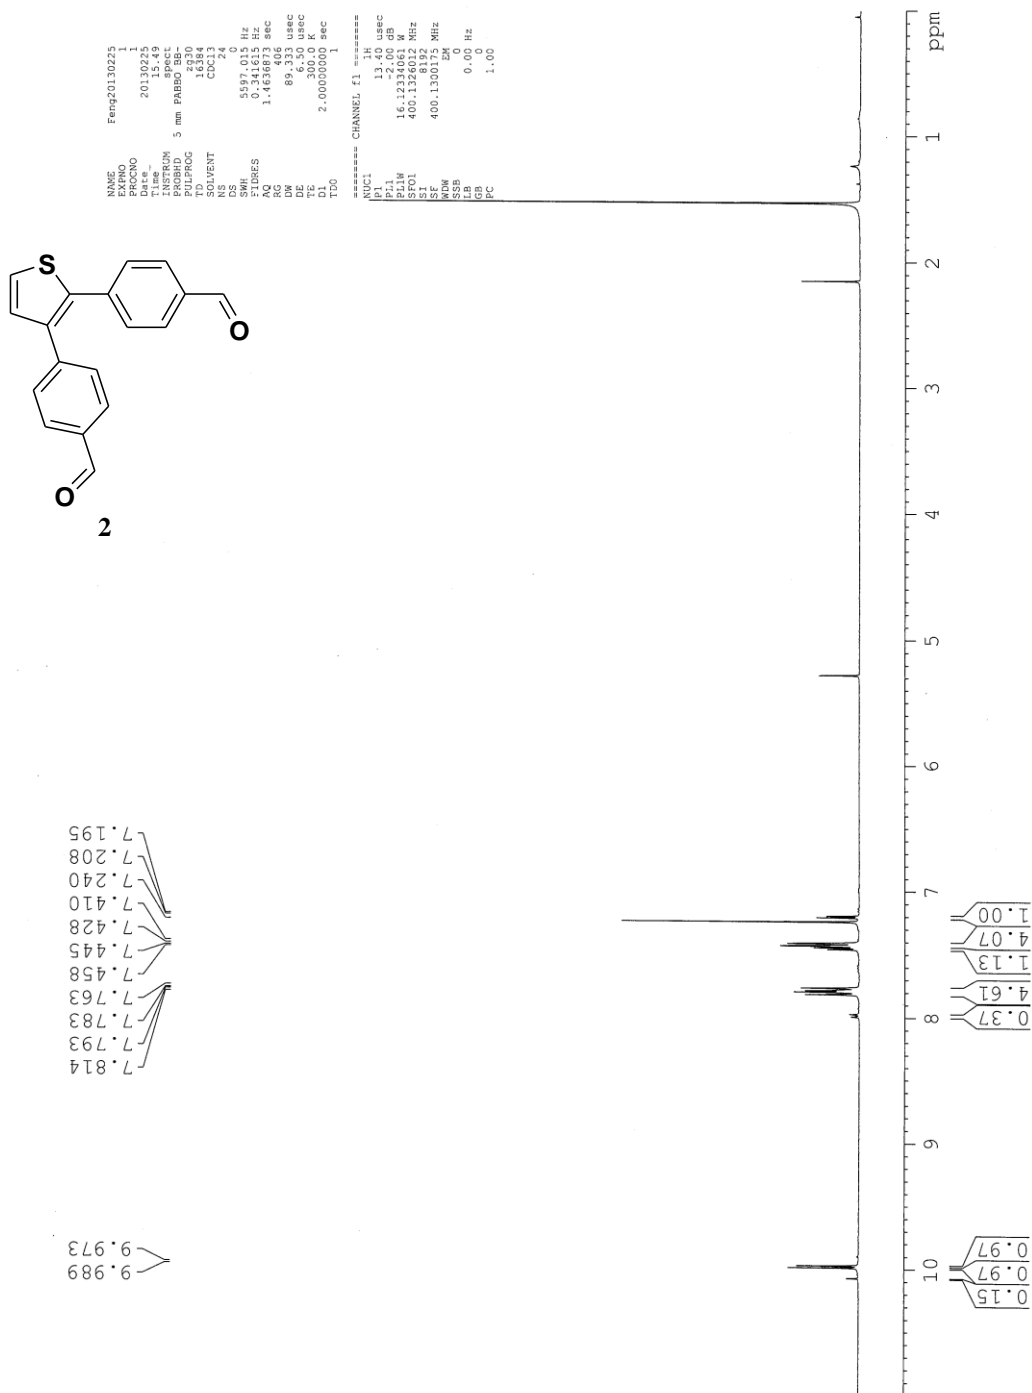



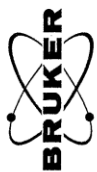

NAME: Cui Hao 20121119  
EXPNO: 1  
PROCNO: 1  
Date\_ : 20121119  
INSTRUM: spect  
PROBHD: 5 mm PABBO BB-  
TD: 65536  
F2: 16384  
SOLVENT: CDCl3  
US: 0  
SWH: 5597.015 Hz  
AQ: 0.18000000 sec  
RG: 1.4438873 sec  
AQ: 0.18 sec  
DE: 89.750 usec  
TE: 300.0 K  
D0: 2.00000000 sec  
D1: 1  
===== CHANNEL f1 =====  
NUC1: 13C  
P1: 13.40 usec  
PL1: -2.00 dB  
PL12: 16.1377 usec  
SFO1: 400.1326012 MHz  
SI: 8192  
WDW: nc  
SSB: 0  
GB: 0  
PC: 1.00

7.100  
7.110  
7.143  
7.153  
7.165  
7.239  
7.638  
7.645  
7.648  
7.655

9.848  
9.861

7.100  
7.110  
7.143  
7.153  
7.165  
7.239  
7.638  
7.645  
7.648  
7.655

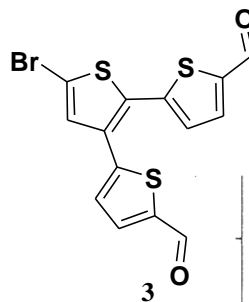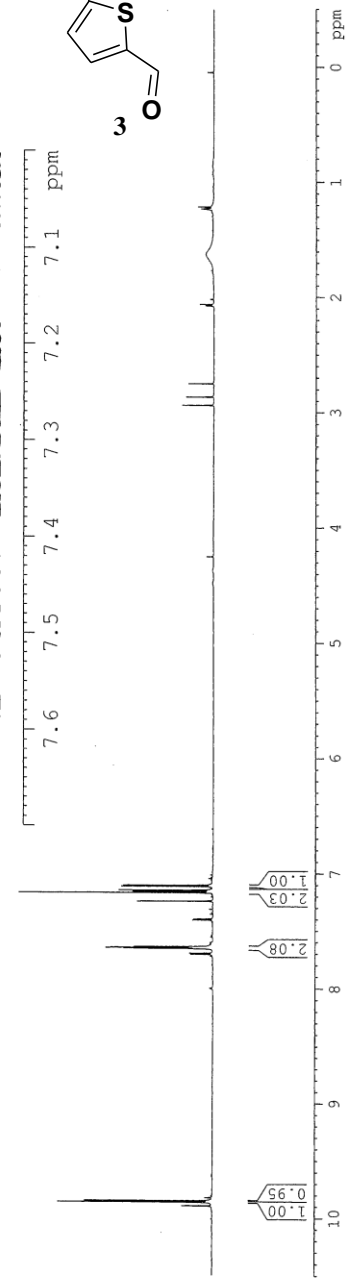

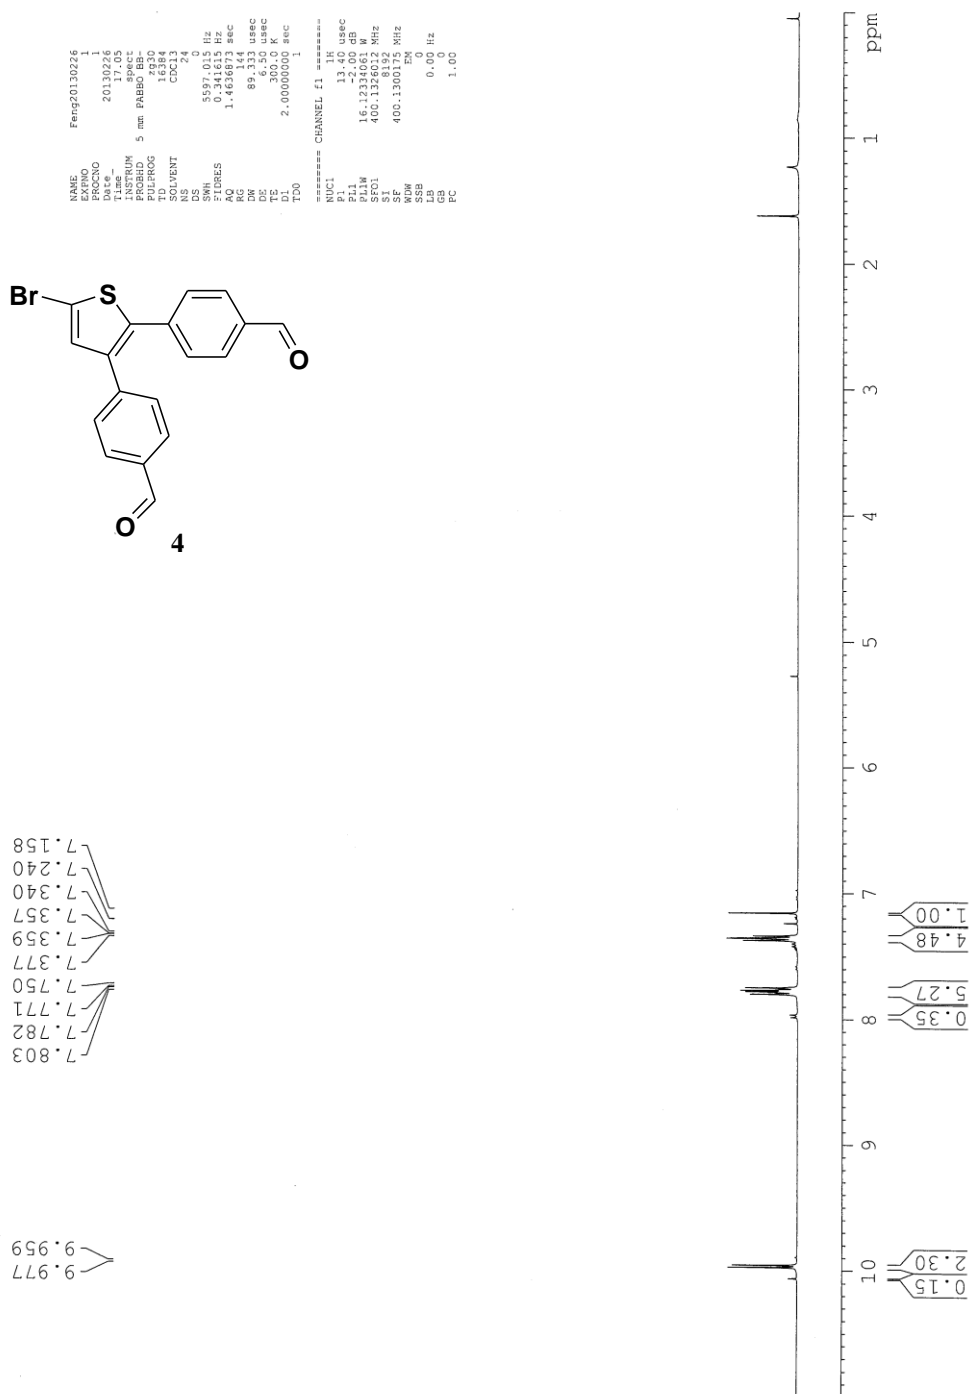

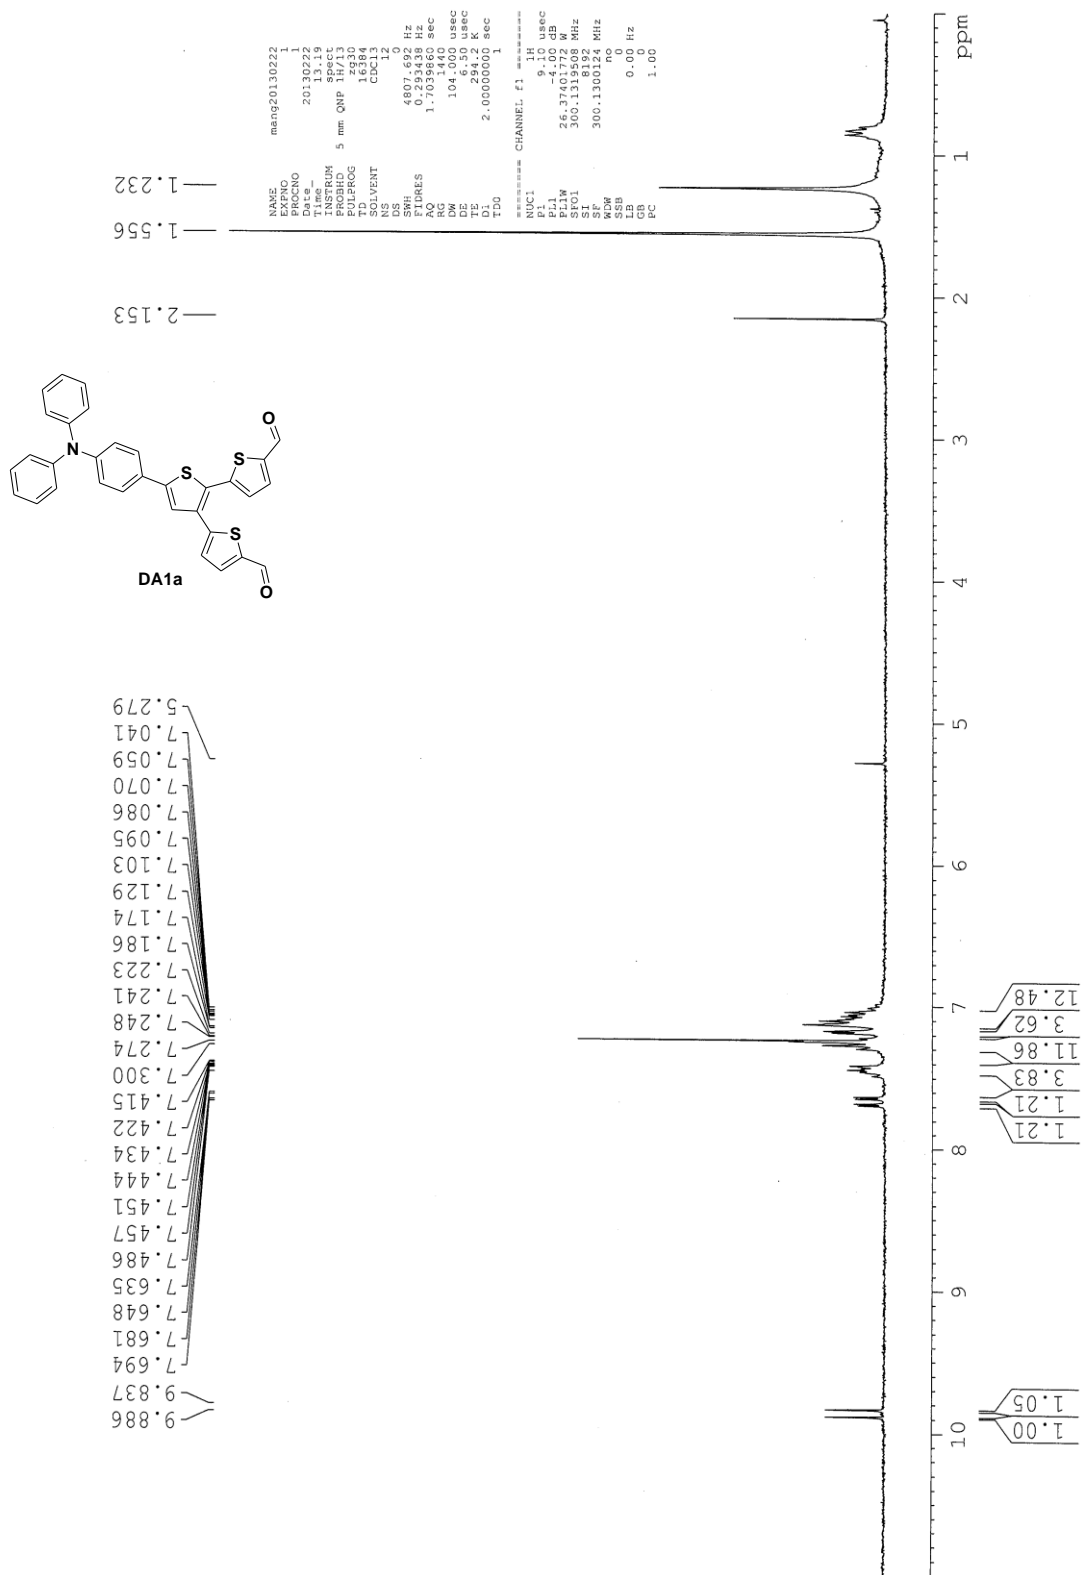

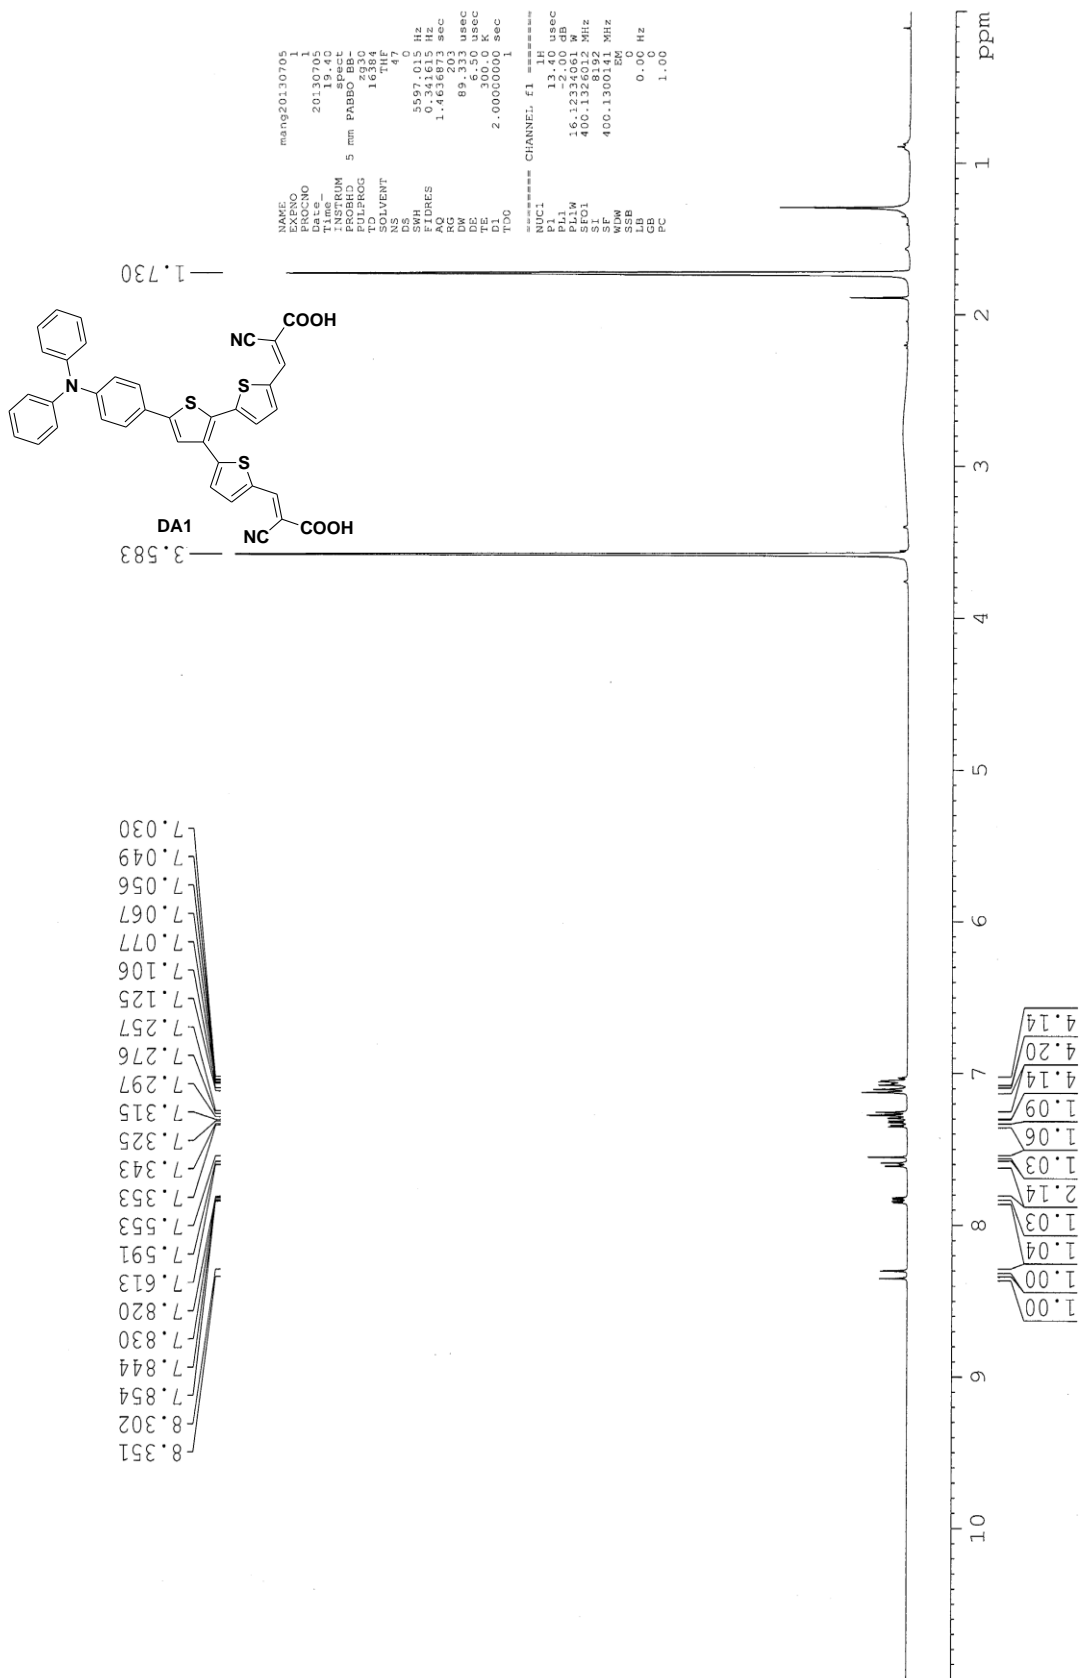

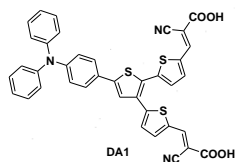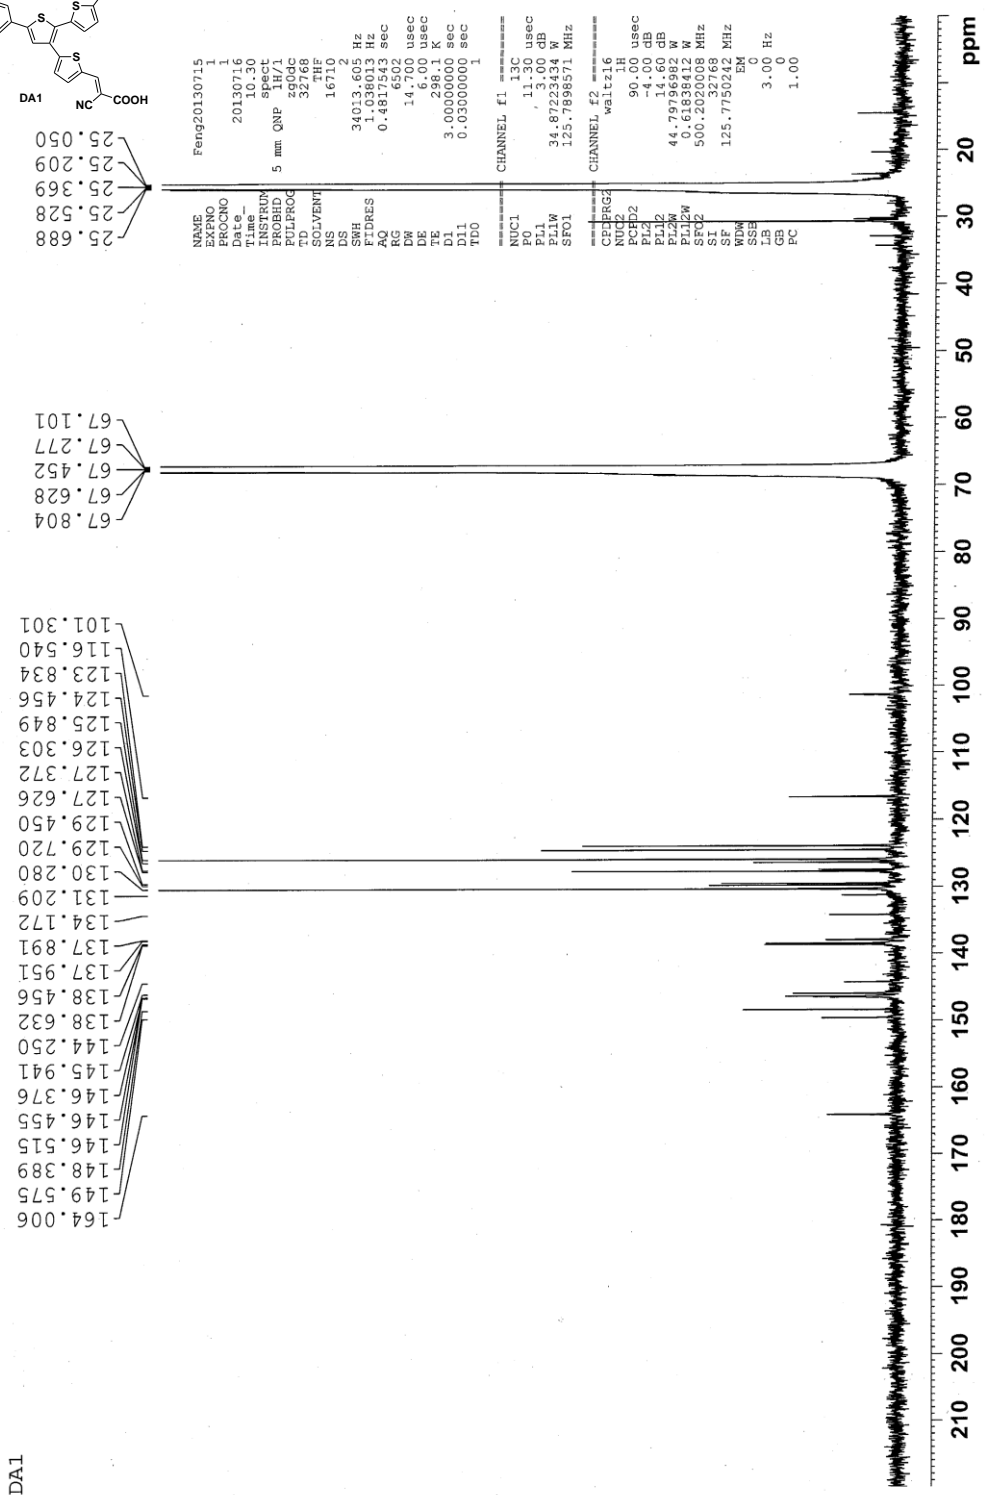

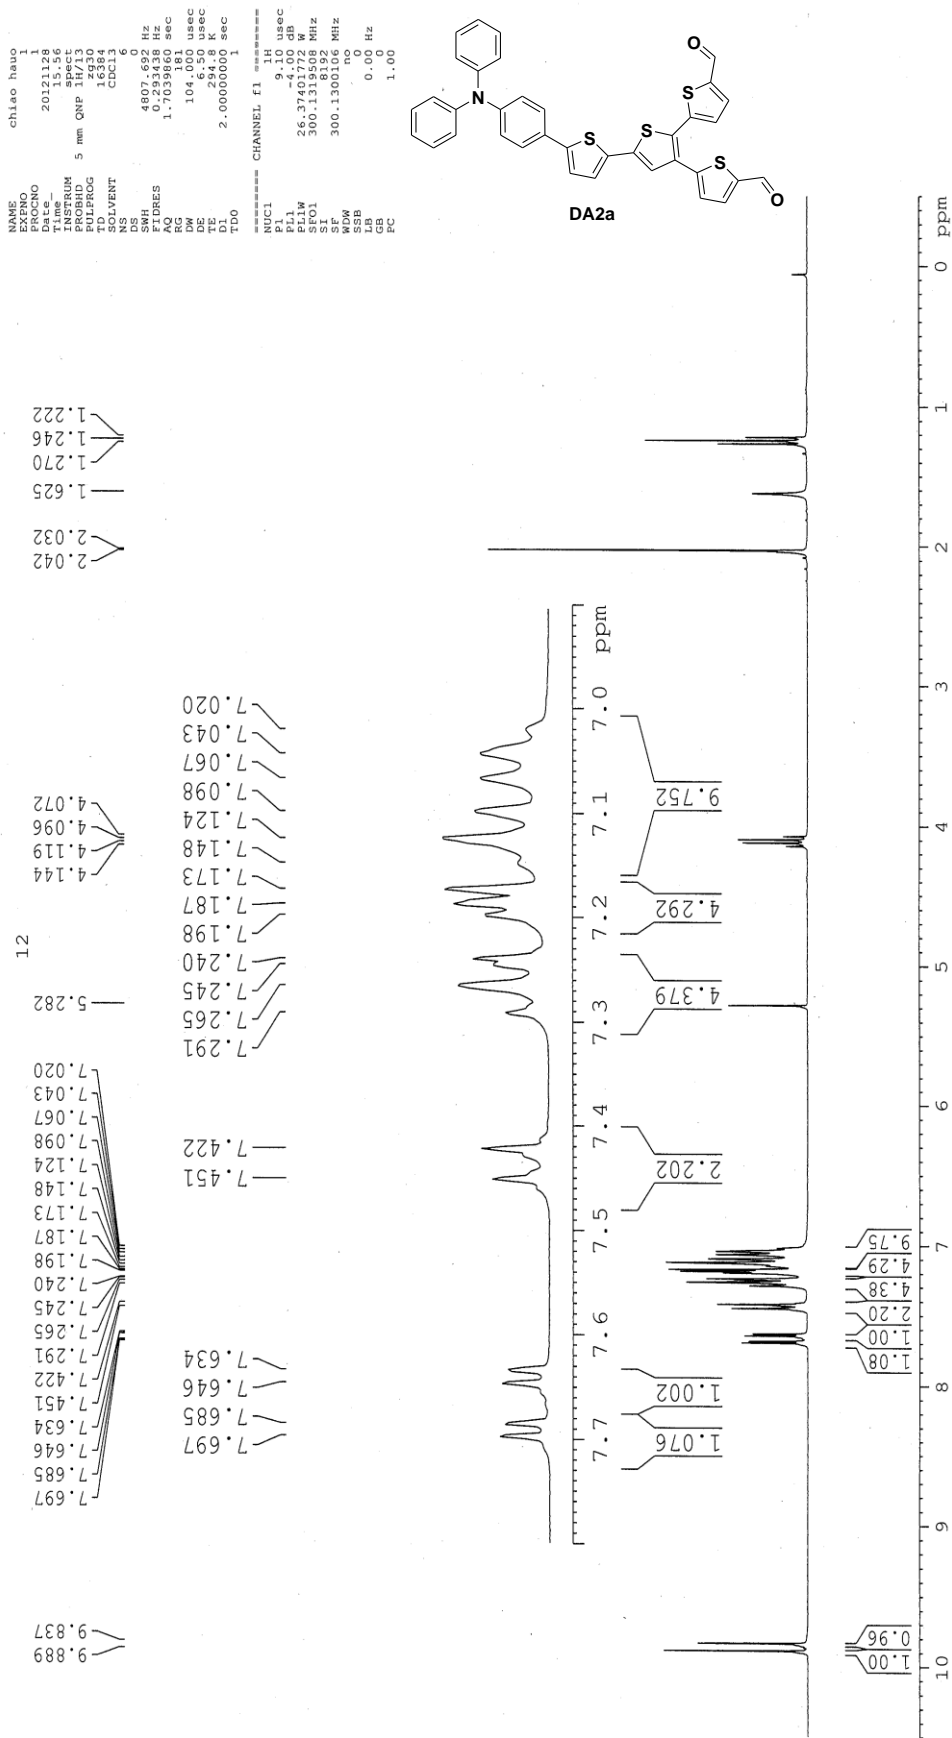

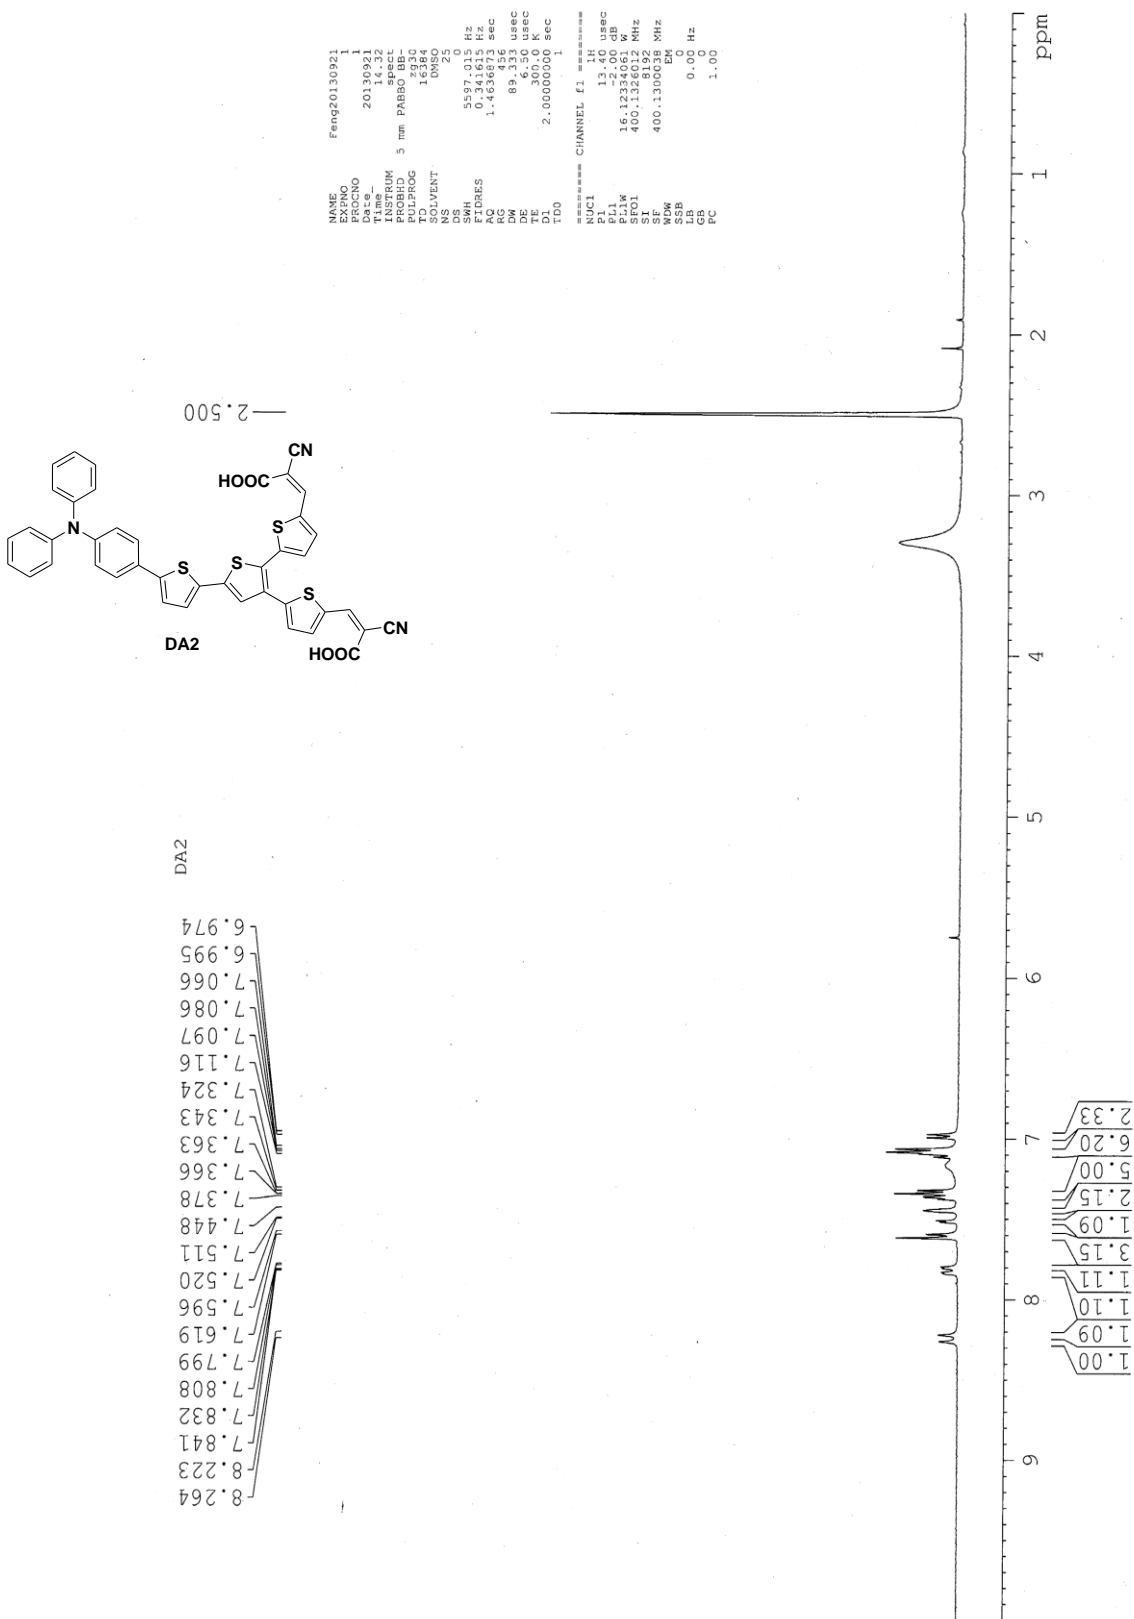







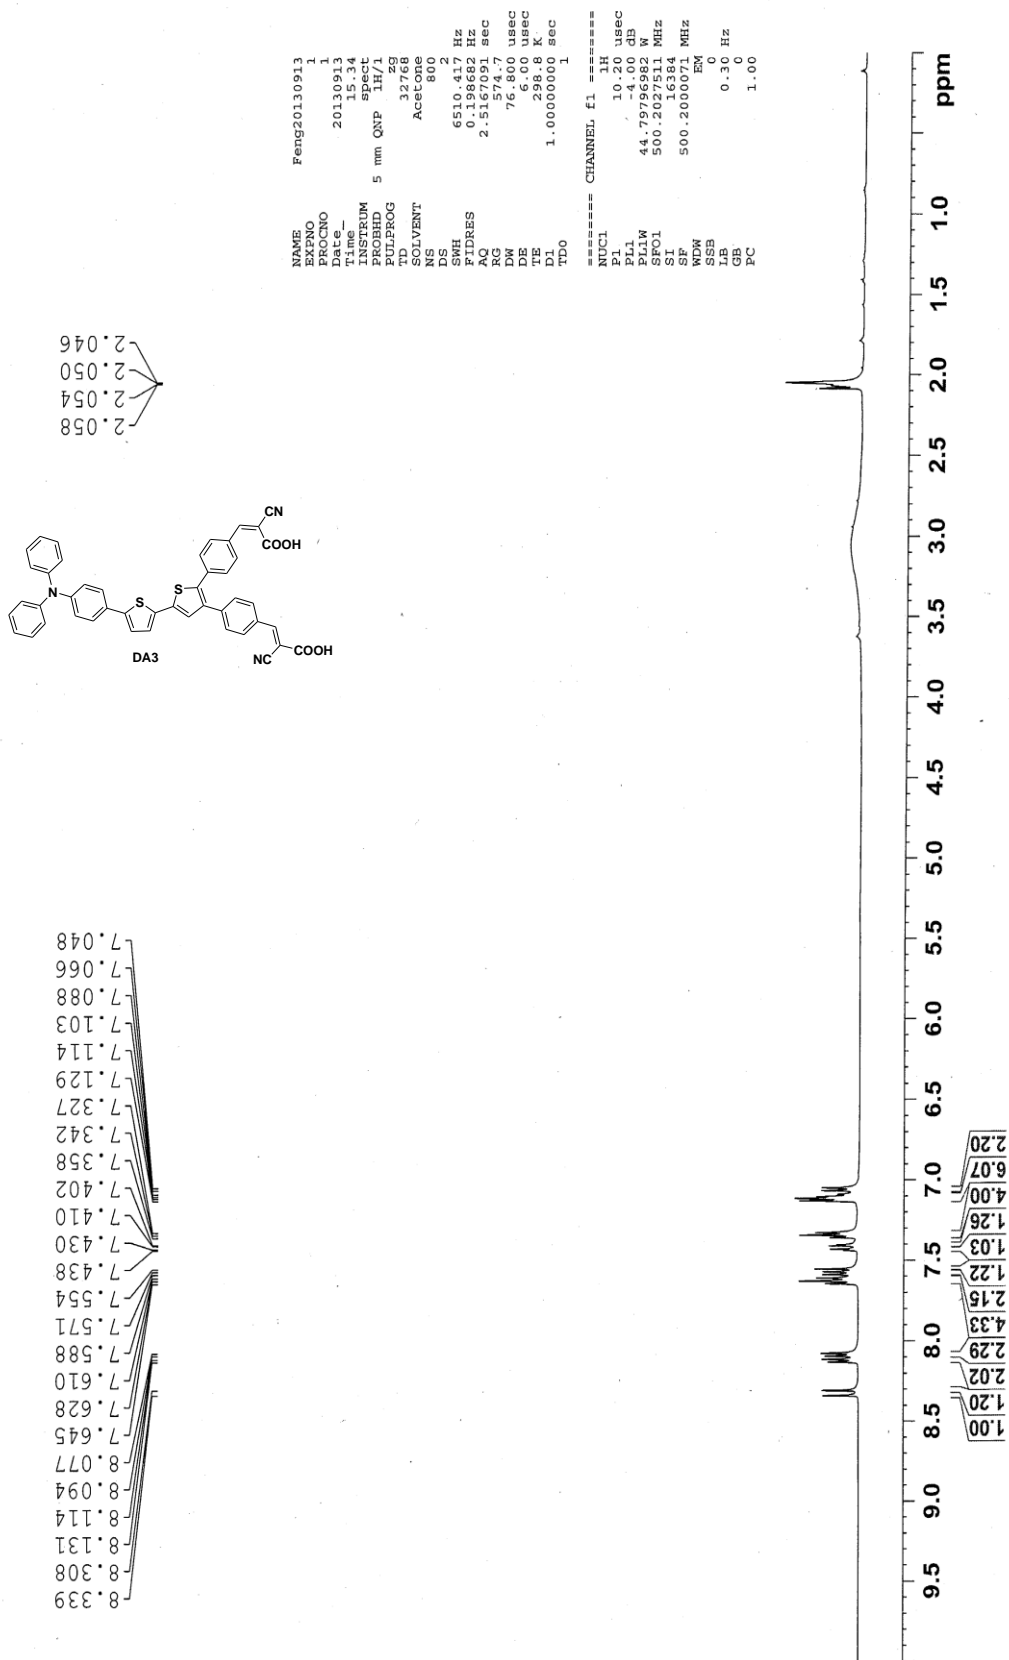

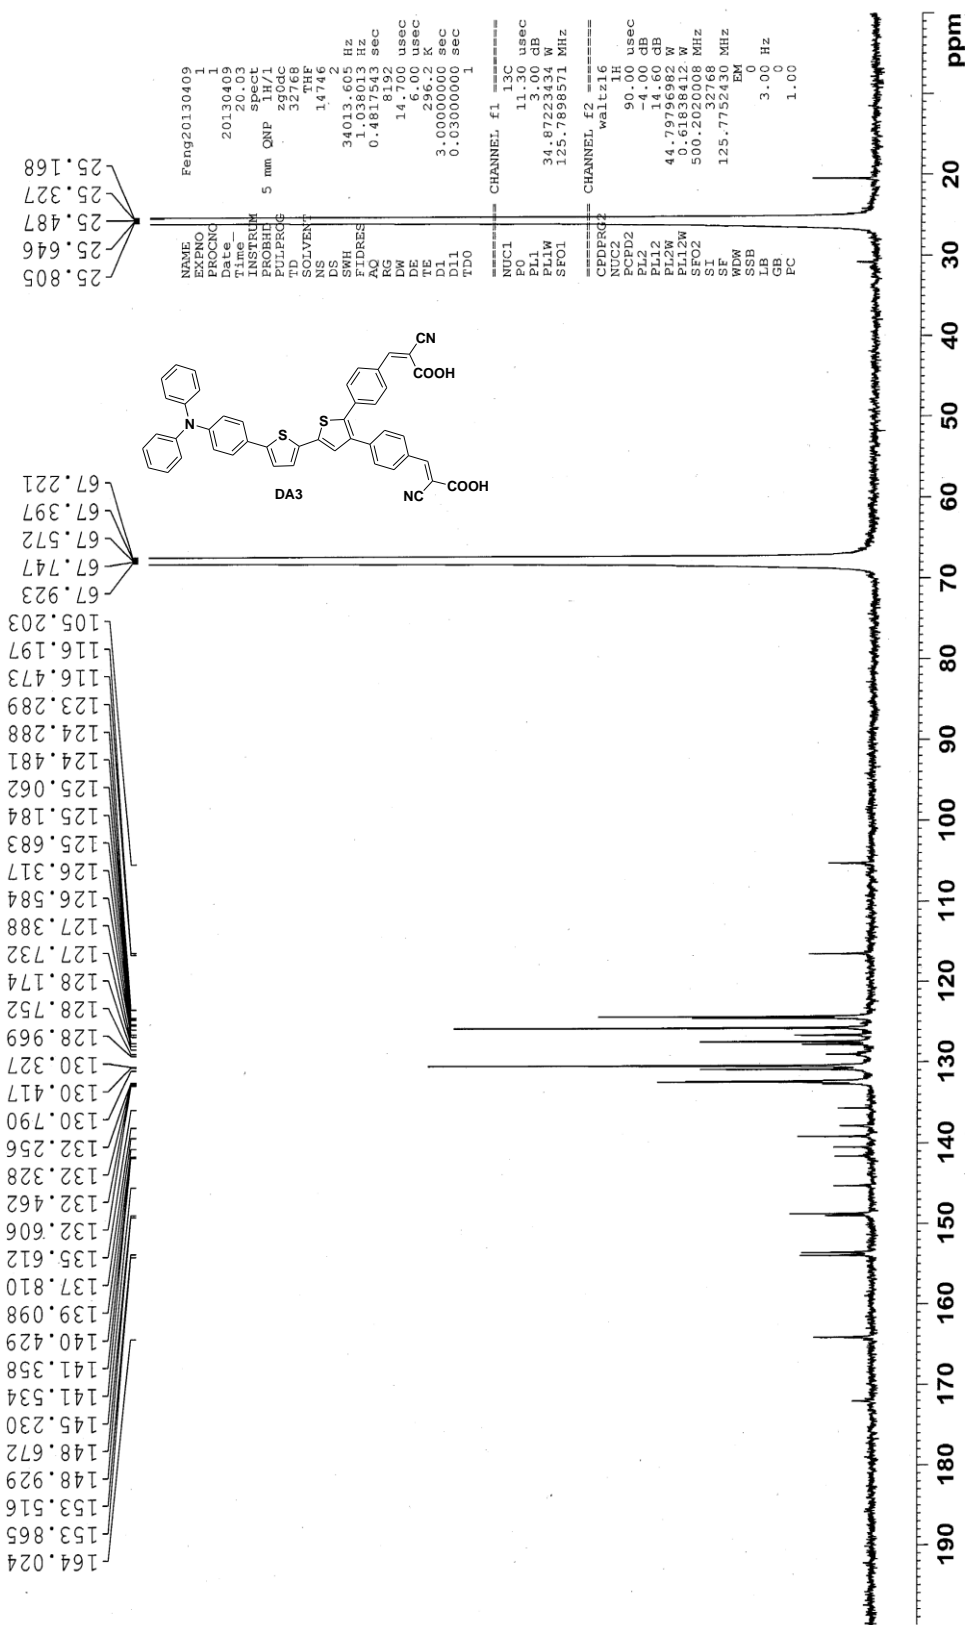

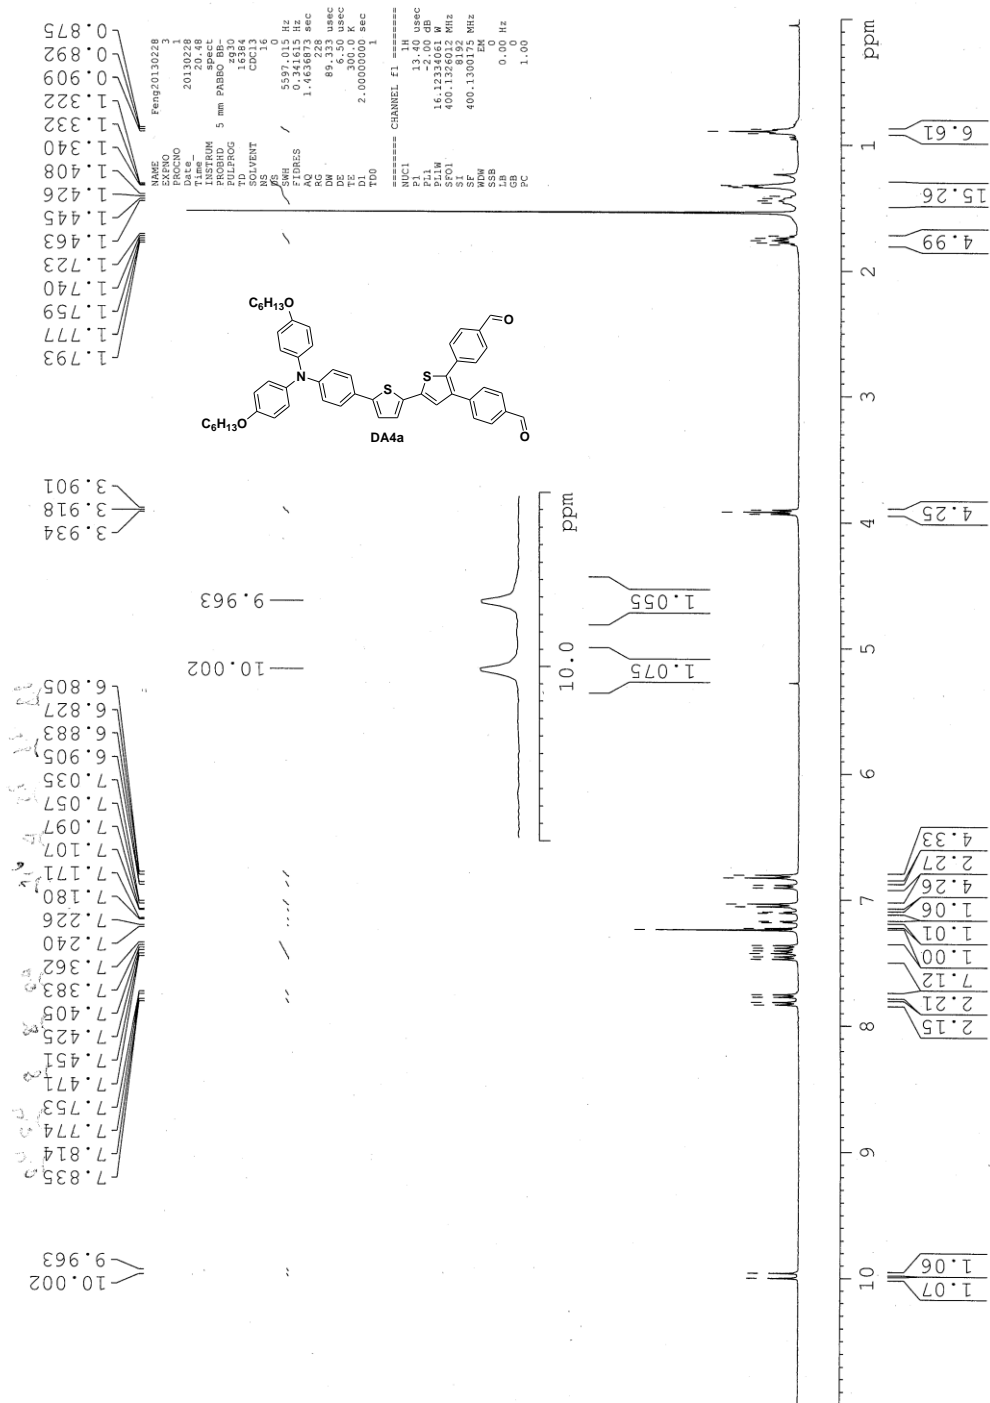

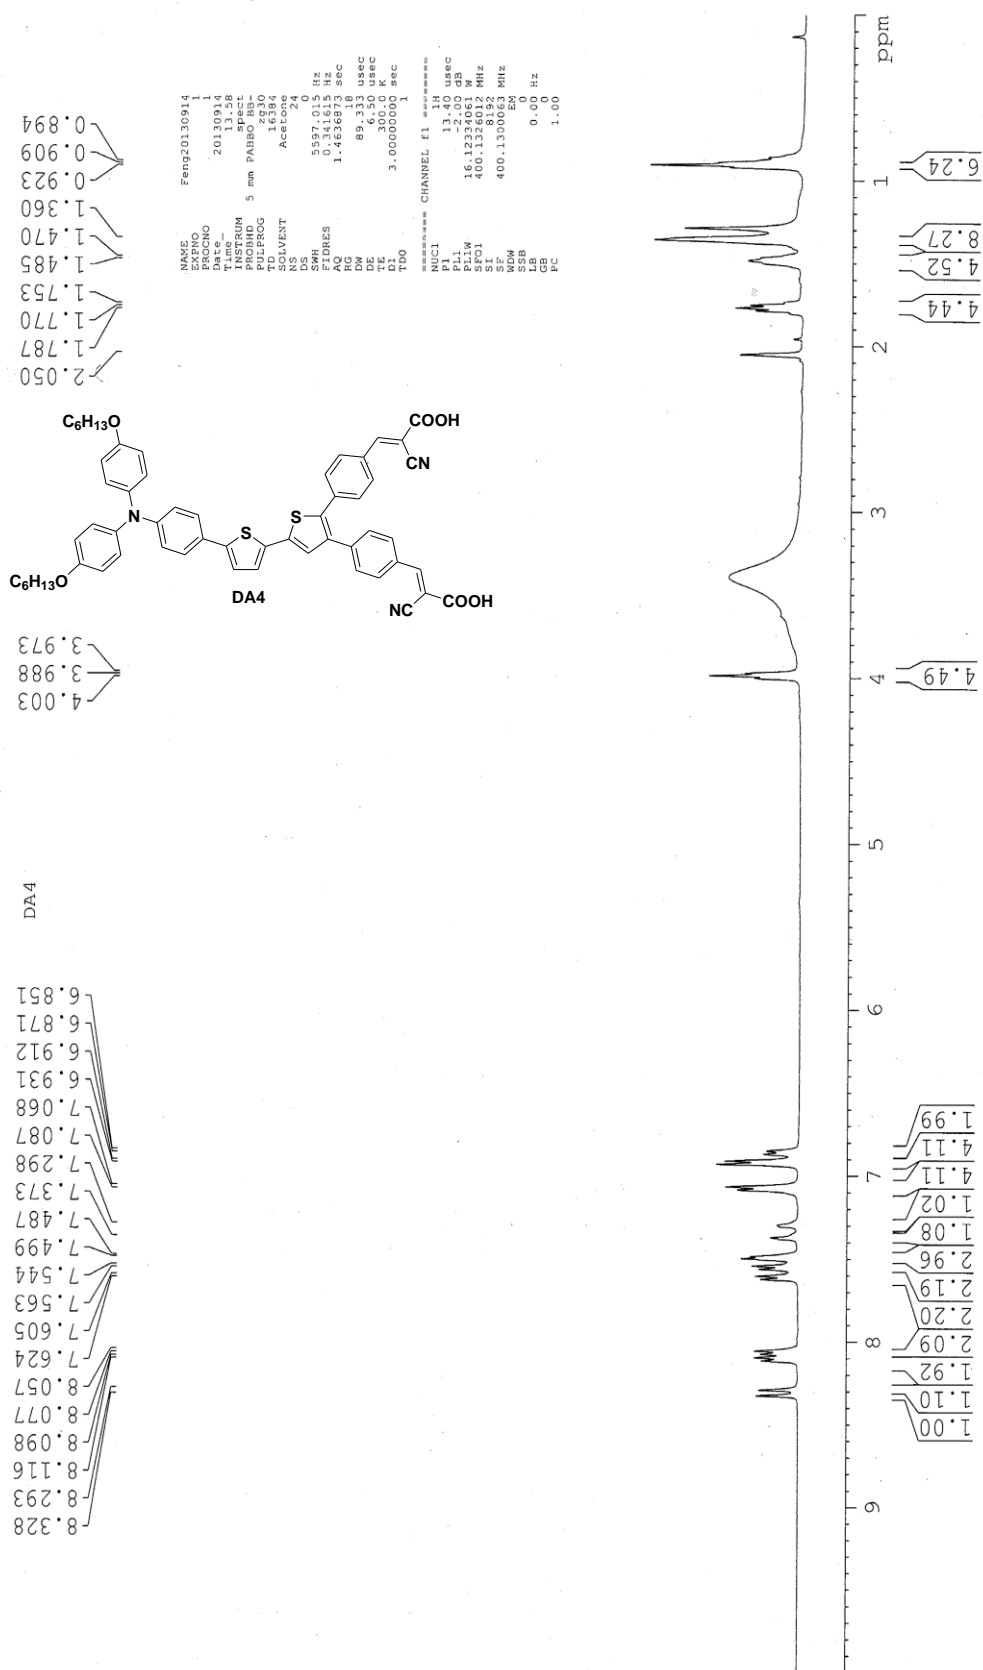

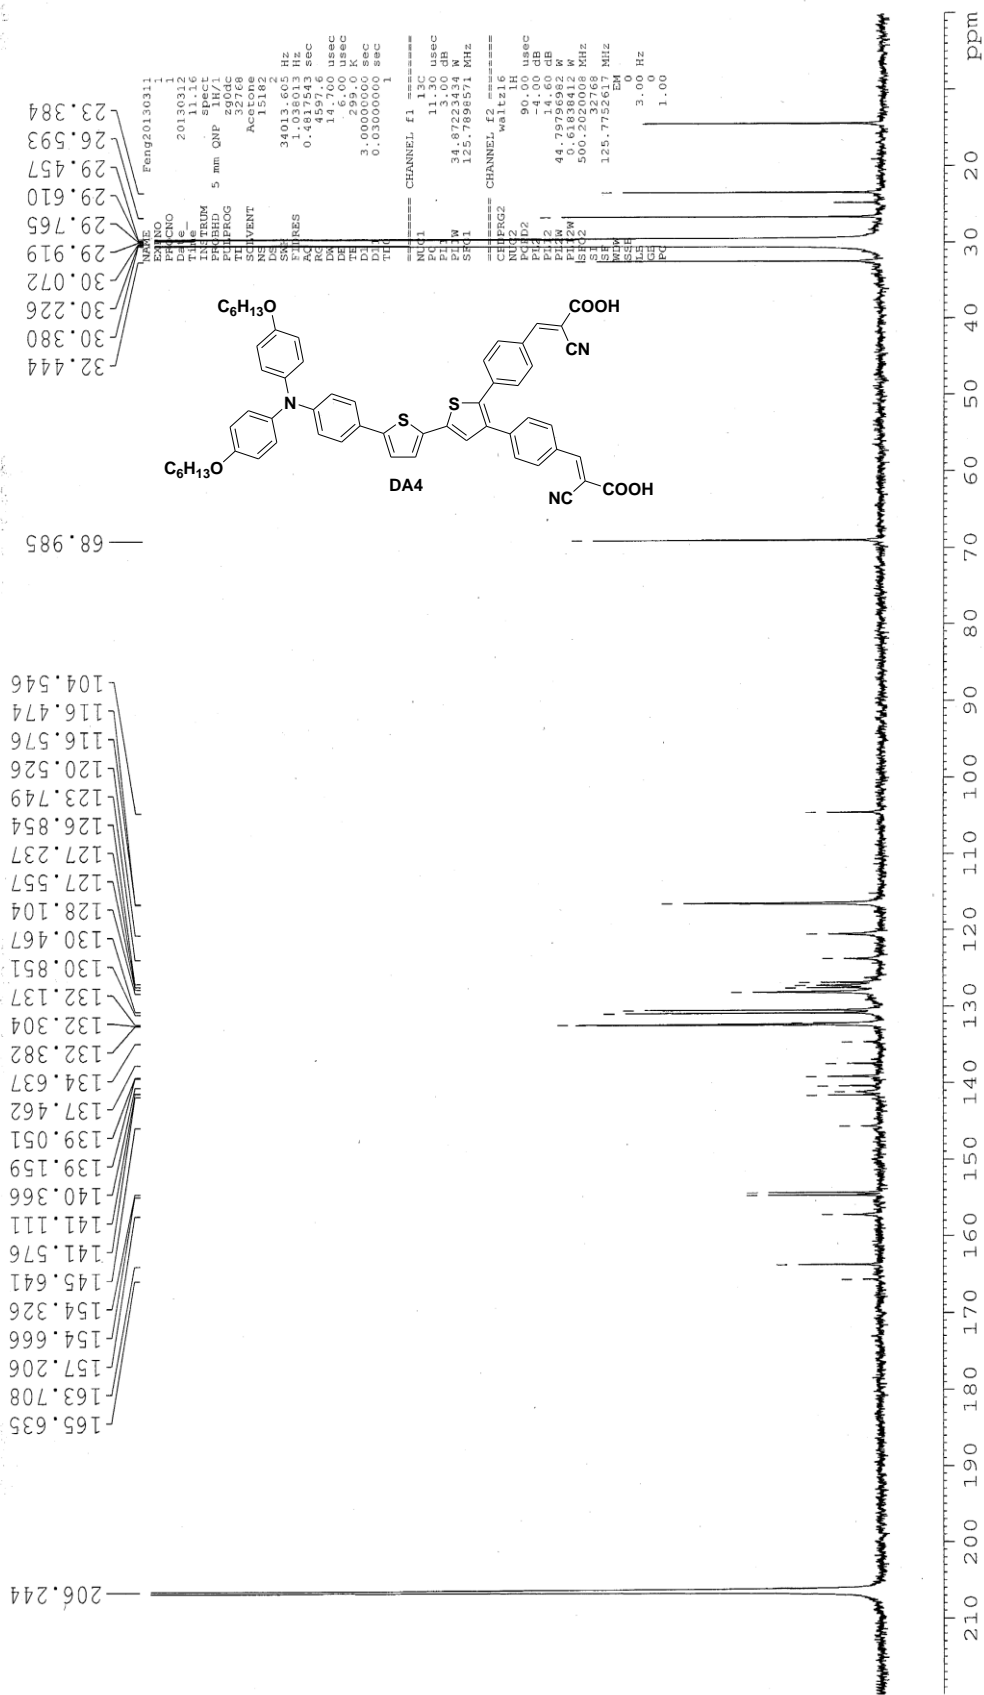

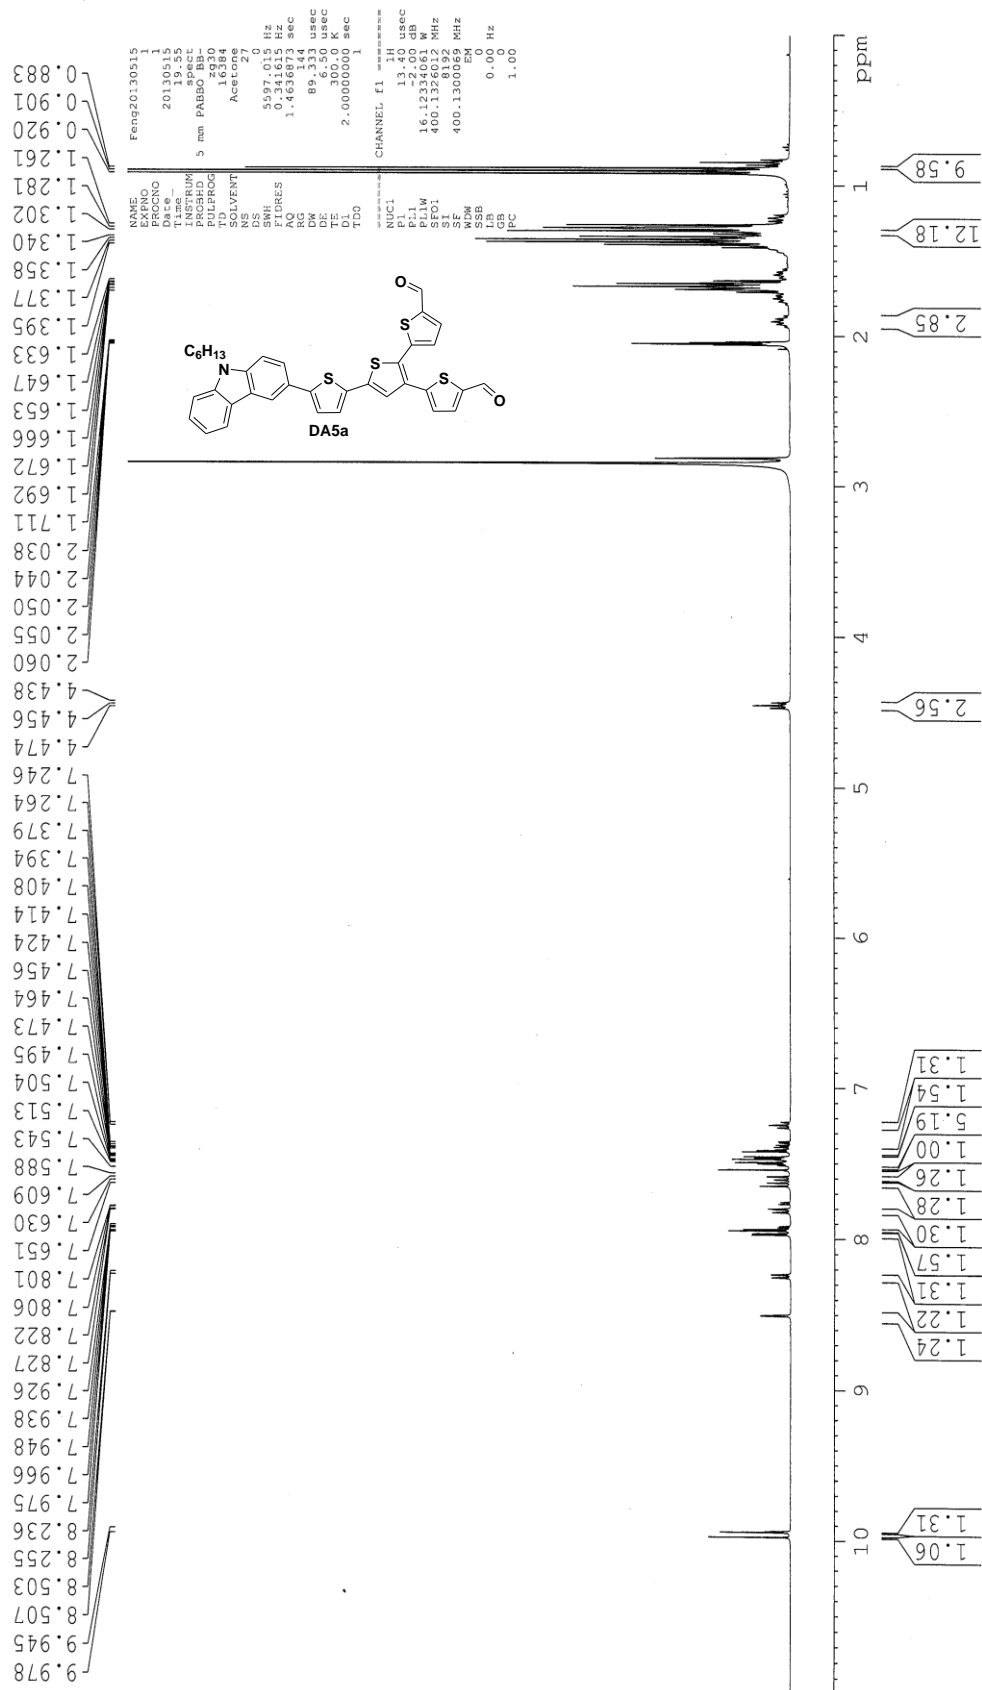

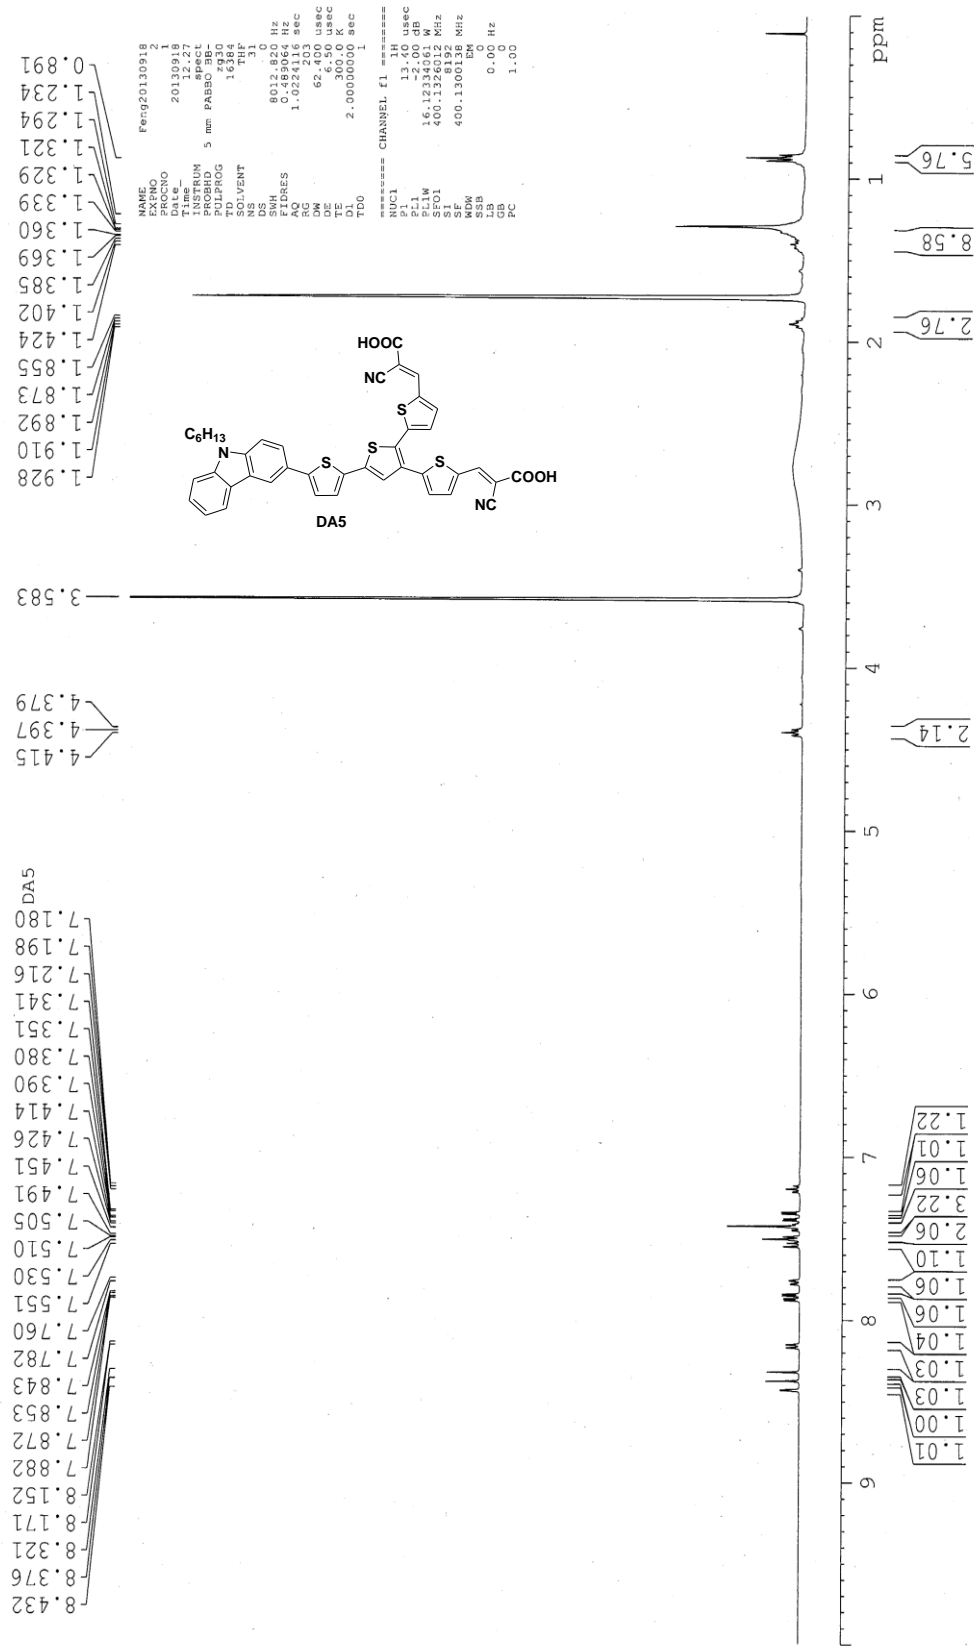

Supplement: c3ta14404f.pdf [file c3ta14404f.pdf]
